# Supplementary material for: Asymmetric antiviral effects of ebolavirus antibodies targeting glycoprotein stem and glycan cap
Source: PubMed Central journal article supplement (PMC6107261; doi:10.1371/journal.ppat.1007204), 2018-08-23

# S12 Figure

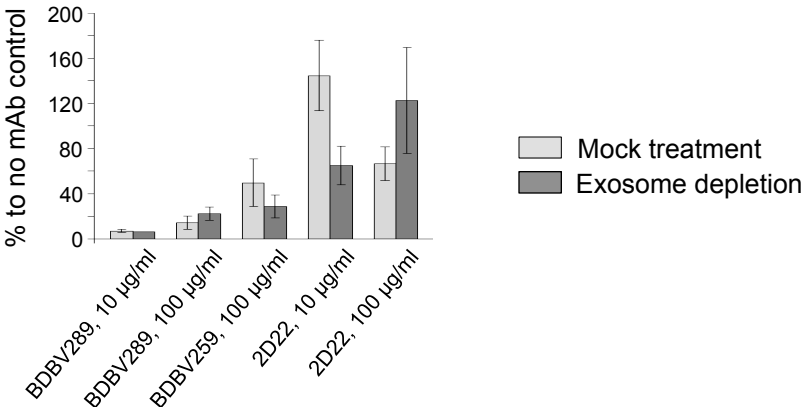

Supplement: ppat.1007204.s012.pdf [file ppat.1007204.s012.pdf]
